# Supplementary material for: Blood-based Biomarkers of Alzheimer’s Disease and Neurodegeneration in an Indigenous African Cohort using both SIMOA and NULISA Platforms
Source: Research Square preprint supplement (doi:10.21203/rs.3.rs-7688955/v1), 2025-10-26
Supplement: Supplementary file 1 [file a6bf52ebeea5351b0782a135.docx]

**Supplementary Figures.**

**Supplementary Figure 1.** Concentrations of plasma biomarkers across the diagnostic groups. ANOVA with post hoc pairwise comparisons were used to determine the log10 transformed biomarker differences (**p* < 0.05, ***p* < 0.01, ****p* < 0.001) **A**. p-tau217. **B.** NfL. **C.** GFAP. **D.** Aβ42/40. **E.** Aβ42. **F.** Aβ40.

**Supplementary Figure 2.** Concentrations of plasma biomarkers across the clinico-pathological groups. ANOVA with post hoc pairwise comparisons were used to determine the log10 transformed biomarker differences (**p* < 0.05, ***p* < 0.01, ****p* < 0.001) **A**. p-tau217. **B.** NfL. **C.** GFAP. **D.** Aβ42/40. **E.** Aβ42. **F.** Aβ40.

**Supplementary Figure 3.** Scatterplot showing the correlation between the plasma biomarkers using Spearman rank correlation and stratified by clinical diagnosis. Spearman’s rho and p-values are show on top of each panel. **A**. correlation between NfL and GFAP. **B.** correlation between NfL and p-tau217. **C.** correlation between GFAP and p-tau217. **D.** correlation between GFAP and Aβ42/40. **E.** Correlation between NfL AND Aβ42/40. **F.** correlation between Aβ42/40and p-tau217.

**Supplementary Figure 4.** Fitted ANCOVA values (adjusted for age and sex) showing plasma biomarkers differences, measured with NULISA, across the clinical groups. Tukey’s corrected post hoc pairwise comparisons were used to determine the significance of biomarker differences between the clinical groups (**p* < 0.05, ***p* < 0.01, ****p* < 0.001) **A**. p-tau217. **B.** NfL. **C.** GFAP. **D.** Aβ42/40. **E.** Aβ42. **F.** Aβ40.

**Supplementary Figure 5.** Concentrations of plasma biomarkers measured with NULISA, across the diagnostic groups. ANOVA with post hoc pairwise comparisons were used to determine the log10 transformed biomarker differences (**p* < 0.05, ***p* < 0.01, ****p* < 0.001) **A**. p-tau217. **B.** NfL. **C.** GFAP. **D.** Aβ42/40. **E.** Aβ42. **F.** Aβ40.

**Supplementary Figure 6.** Fitted ANCOVA values (adjusted for age and sex) showing plasma biomarkers differences, measured with NULISA, across the clinico-pathological groups. Tukey’s corrected post hoc pairwise comparisons were used to determine the significance of biomarker differences between the clinico-pathological groups (**p* < 0.05, ***p* < 0.01, ****p* < 0.001) **A**. p-tau217. **B.** NfL. **C.** GFAP. **D.** Aβ42/40. **E.** Aβ42. **F.** Aβ40.

**Supplementary Figure 7.** Concentrations of plasma biomarkers measured with NULISA, across the clinico-pathological groups. ANOVA with post hoc pairwise comparisons were used to determine the log10 transformed biomarker differences (**p* < 0.05, ***p* < 0.01, ****p* < 0.001) **A**. p-tau217. **B.** NfL. **C.** GFAP. **D.** Aβ42/40. **E.** Aβ42. **F.** Aβ40.

**Supplementary Figure 8.** Boxplots showing sex-stratified distributions of biomarker levels across amyloid positive groups. Each panel represents one protein marker with males and females displayed separately. Data are shown as standardized z-scores (scaled to the cognitively unimpaired Aβ− group) and t-test results are displayed (**p* < 0.05, ***p* < 0.01, ****p* < 0.001). **A**. Aβ42/40. **B.** GFAP. **C.** NfL. **D.** P-tau217.

**Supplementary Figure 9.** Boxplots showing sex-stratified distributions of biomarker levels across amyloid negative groups. Each panel represents one protein marker with males and females displayed separately. Data are shown as standardized z-scores (scaled to the cognitively unimpaired Aβ− group) and and t-test results are displayed (**p* < 0.05, ***p* < 0.01, ****p* < 0.001). **A**. Aβ42/40. **B.** GFAP. **C.** NfL. **D.** P-tau217.

**Supplementary Figure 10.** Contingency table showing counts and percent of the total. Rows indicate the NULISA positive/negative, according to APOE4 status while columns indicate the genotyping positive/negative. Shading reflects frequency, with darker colors indicating more observations.

**Supplementary Tables**

**Supplementary Table 1.** Demographics of the participants by clinico-pathological group. Values are reported in mean (s.d) or number (%).

|  | CU- (N=708) | CU+ (N=120) | MCI+ (N=22) | ADD (N=11) | MCI- (N=84) | NonAD (N=22) |
| --- | --- | --- | --- | --- | --- | --- |
| **Sex** |  |  |  |  |  |  |
| Male | 183 (25.8%) | 49 (40.8%) | 5 (22.7%) | 3 (27.3%) | 12 (14.3%) | 5 (22.7%) |
| Female | 523 (73.9%) | 70 (58.3%) | 17 (77.3%) | 8 (72.7%) | 72 (85.7%) | 17 (77.3%) |
| **Age** | 64 (± 9.6) | 64 (± 10) | 75 (± 11) | 81 (± 8.1) | 72 (± 9.4) | 75 (± 11) |
| **Years of education** | 6.1 (± 4.7) | 6.7 (± 4.8) | 2.1 (± 2.7) | 3.2 (± 5.3) | 2.7 (± 3.9) | 1.2 (± 2.4) |
| **p-tau217 pg/mL** | 0.21 (± 0.072) | 0.39 (± 0.26) | 0.59 (± 0.35) | 0.55 (± 0.39) | 0.22 (± 0.075) | 0.23 (± 0.067) |
| **GFAP pg/mL** | 120 (± 96) | 120 (± 91) | 200 (± 140) | 250 (± 110) | 180 (± 190) | 140 (± 92) |
| **NfL pg/mL** | 23 (± 54) | 26 (± 32) | 39 (± 23) | 41 (± 22) | 29 (± 30) | 49 (± 68) |
| **Aß40 pg/mL** | 47 (± 28) | 46 (± 29) | 50 (± 30) | 44 (± 23) | 36 (± 21) | 38 (± 25) |
| **Aß42 pg/mL** | 3.2 (± 2.5) | 3.1 (± 2.4) | 3.0 (± 1.8) | 2.1 (± 1.5) | 3.0 (± 1.8) | 2.9 (± 1.7) |
| **Aß42/40 ratio** | 0.11 (± 0.18) | 0.36 (± 2.7) | 0.075 (± 0.050) | 0.065 (± 0.052) | 0.12 (± 0.21) | 0.17 (± 0.31) |
|  |  |  |  |  |  |  |

**Supplementary Table 2.** Results of ANCOVA with post-hoc Tukey pairwise comparisons between diagnostic groups for each protein marker. The table reports the estimated mean difference (estimate), standard error (SE), degrees of freedom (df), t-ratio, and adjusted p-value. Significance is annotated as ***p < 0.001; **p < 0.01; *p < 0.05; ns = not significant.

| **marker** | **Group1** | **Group2** | **estimate** | **SE** | **df** | **t.ratio** | **p.value** | **annotation** |
| --- | --- | --- | --- | --- | --- | --- | --- | --- |
| **NfL (log)** | CU | Dem | -0.120 | 0.047 | 953 | -2.536 | 0.031 | * |
| **NfL (log)** | CU | MCI | -0.057 | 0.028 | 953 | -2.037 | 0.104 | ns |
| **NfL (log)** | MCI | Dem | -0.063 | 0.052 | 953 | -1.219 | 0.442 | ns |
| **ptau-217 (log)** | CU | Dem | -0.067 | 0.028 | 954 | -2.429 | 0.041 | * |
| **ptau-217 (log)** | CU | MCI | -0.037 | 0.016 | 954 | -2.270 | 0.061 | ns |
| **ptau-217 (log)** | MCI | Dem | -0.030 | 0.030 | 954 | -0.996 | 0.580 | ns |
| **Aβ42/40** | CU | MCI | -0.043 | 0.043 | 930 | -1.006 | 0.573 | ns |
| **Aβ42/40** | MCI | Dem | 0.051 | 0.079 | 930 | 0.637 | 0.800 | ns |
| **Aβ42/40** | CU | Dem | 0.008 | 0.073 | 930 | 0.107 | 0.994 | ns |
| **Aβ40 (log)** | CU | MCI | 0.065 | 0.038 | 940 | 1.694 | 0.208 | ns |
| **Aβ40 (log)** | CU | Dem | 0.070 | 0.066 | 940 | 1.050 | 0.546 | ns |
| **Aβ40 (log)** | MCI | Dem | 0.004 | 0.072 | 940 | 0.060 | 0.998 | ns |
| **Aβ42 (log)** | CU | Dem | 0.079 | 0.057 | 944 | 1.388 | 0.348 | ns |
| **Aβ42 (log)** | MCI | Dem | 0.054 | 0.062 | 944 | 0.875 | 0.656 | ns |
| **Aβ42 (log)** | CU | MCI | 0.025 | 0.034 | 944 | 0.732 | 0.745 | ns |
| **GFAP (log)** | CU | MCI | -0.124 | 0.062 | 954 | -2.004 | 0.112 | ns |
| **GFAP (log)** | CU | Dem | -0.067 | 0.105 | 954 | -0.638 | 0.799 | ns |
| **GFAP (log)** | MCI | Dem | 0.057 | 0.115 | 954 | 0.499 | 0.872 | ns |

**Supplementary Table 3.** Results of ANOVA with post-hoc Tukey pairwise comparisons between diagnostic groups for each protein marker. The table reports the estimated mean for the two groups, mean difference (estimate) and adjusted p-value. Significance is annotated as ***p < 0.001; **p < 0.01; *p < 0.05; ns = not significant.

| **marker** | **Group1** | **Group2** | **Mean 1** | **Mean 2** | **Estimate** | **p.value** | **annotation** |
| --- | --- | --- | --- | --- | --- | --- | --- |
| **Aβ40 (log)** | MCI | CU | 1.566717 | 1.566717 | -0.07311 | 0.005668 | ** |
| **Aβ40 (log)** | Dem | CU | 1.566717 | 1.566717 | -0.08062 | 0.347177 | ns |
| **Aβ40 (log)** | Dem | MCI | 1.493608 | 1.493608 | -0.00751 | 0.622796 | ns |
| **Aβ42/40** | Dem | CU | 0.249571 | 0.249571 | 0.011143 | 0.764585 | ns |
| **Aβ42/40** | Dem | MCI | 0.2584 | 0.2584 | 0.002314 | 0.764585 | ns |
| **Aβ42/40** | MCI | CU | 0.249571 | 0.249571 | 0.008829 | 0.776614 | ns |
| **Aβ42 (log)** | Dem | CU | 0.397368 | 0.397368 | -0.05399 | 0.417476 | ns |
| **Aβ42 (log)** | Dem | MCI | 0.385836 | 0.385836 | -0.04245 | 0.417476 | ns |
| **Aβ42 (log)** | MCI | CU | 0.397368 | 0.397368 | -0.01153 | 0.895216 | ns |
| **GFAP (log)** | MCI | CU | 1.887214 | 1.887214 | 0.199783 | 6.38E-08 | *** |
| **GFAP (log)** | Dem | CU | 1.887214 | 1.887214 | 0.182389 | 0.002321 | ** |
| **GFAP (log)** | Dem | MCI | 2.086997 | 2.086997 | -0.01739 | 0.956574 | ns |
| **NfL (log)** | MCI | CU | 1.224425 | 1.224425 | 0.165007 | 1.47E-08 | *** |
| **NfL (log)** | Dem | CU | 1.224425 | 1.224425 | 0.286844 | 5.56E-07 | *** |
| **NfL (log)** | Dem | MCI | 1.389431 | 1.389431 | 0.121837 | 0.073532 | ns |
| **ptau-217 (log)** | Dem | CU | -0.67947 | -0.67947 | 0.119888 | 0.027167 | * |
| **ptau-217 (log)** | MCI | CU | -0.67947 | -0.67947 | 0.066612 | 0.054824 | ns |
| **ptau-217 (log)** | Dem | MCI | -0.61285 | -0.61285 | 0.053275 | 0.229981 | ns |

**Supplementary Table 4.** Results of ANCOVA with post-hoc Tukey pairwise comparisons between clinico-pathological groups for each protein marker. The table reports the estimated mean difference (estimate), standard error (SE), degrees of freedom (df), t-ratio, and adjusted p-value. Significance is annotated as ***p < 0.001; **p < 0.01; *p < 0.05; ns = not significant.

| **marker** | **Group1** | **Group2** | **estimate** | **SE** | **df** | **t.ratio** | **p.value** | **annotation** |
| --- | --- | --- | --- | --- | --- | --- | --- | --- |
| **NfL (log)** | CU- | MCI+ | -0.163 | 0.057 | 950 | -2.866 | 0.049 | * |
| **NfL (log)** | CU- | NonAD | -0.129 | 0.057 | 950 | -2.270 | 0.208 | ns |
| **NfL (log)** | MCI+ | MCI- | 0.124 | 0.062 | 950 | 2.001 | 0.342 | ns |
| **NfL (log)** | CU- | CU+ | -0.050 | 0.026 | 950 | -1.923 | 0.389 | ns |
| **NfL (log)** | CU+ | MCI+ | -0.113 | 0.061 | 950 | -1.863 | 0.426 | ns |
| **NfL (log)** | CU- | ADD | -0.128 | 0.080 | 950 | -1.603 | 0.597 | ns |
| **NfL (log)** | MCI- | NonAD | -0.090 | 0.062 | 950 | -1.457 | 0.692 | ns |
| **NfL (log)** | CU+ | NonAD | -0.079 | 0.061 | 950 | -1.306 | 0.782 | ns |
| **NfL (log)** | CU- | MCI- | -0.039 | 0.031 | 950 | -1.248 | 0.813 | ns |
| **NfL (log)** | ADD | MCI- | 0.090 | 0.083 | 950 | 1.075 | 0.891 | ns |
| **NfL (log)** | CU+ | ADD | -0.079 | 0.083 | 950 | -0.950 | 0.933 | ns |
| **NfL (log)** | MCI+ | NonAD | 0.034 | 0.078 | 950 | 0.433 | 0.998 | ns |
| **NfL (log)** | MCI+ | ADD | 0.035 | 0.096 | 950 | 0.362 | 0.999 | ns |
| **NfL (log)** | CU+ | MCI- | 0.011 | 0.038 | 950 | 0.288 | 1.000 | ns |
| **NfL (log)** | ADD | NonAD | -0.001 | 0.096 | 950 | -0.009 | 1.000 | ns |
| **ptau-217 (log)** | CU- | CU+ | -0.166 | 0.013 | 951 | -12.882 | 0.000 | *** |
| **ptau-217 (log)** | CU- | MCI+ | -0.352 | 0.028 | 951 | -12.419 | 0.000 | *** |
| **ptau-217 (log)** | MCI+ | MCI- | 0.366 | 0.031 | 951 | 11.806 | 0.000 | *** |
| **ptau-217 (log)** | CU+ | MCI- | 0.179 | 0.019 | 951 | 9.477 | 0.000 | *** |
| **ptau-217 (log)** | MCI+ | NonAD | 0.357 | 0.039 | 951 | 9.183 | 0.000 | *** |
| **ptau-217 (log)** | ADD | MCI- | 0.314 | 0.042 | 951 | 7.533 | 0.000 | *** |
| **ptau-217 (log)** | CU- | ADD | -0.300 | 0.040 | 951 | -7.509 | 0.000 | *** |
| **ptau-217 (log)** | ADD | NonAD | 0.305 | 0.048 | 951 | 6.392 | 0.000 | *** |
| **ptau-217 (log)** | CU+ | MCI+ | -0.186 | 0.030 | 951 | -6.139 | 0.000 | *** |
| **ptau-217 (log)** | CU+ | NonAD | 0.171 | 0.030 | 951 | 5.631 | 0.000 | *** |
| **ptau-217 (log)** | CU+ | ADD | -0.134 | 0.041 | 951 | -3.242 | 0.016 | * |
| **ptau-217 (log)** | MCI+ | ADD | 0.052 | 0.048 | 951 | 1.095 | 0.884 | ns |
| **ptau-217 (log)** | CU- | MCI- | 0.014 | 0.015 | 951 | 0.875 | 0.952 | ns |
| **ptau-217 (log)** | MCI- | NonAD | -0.008 | 0.031 | 951 | -0.271 | 1.000 | ns |
| **ptau-217 (log)** | CU- | NonAD | 0.005 | 0.028 | 951 | 0.180 | 1.000 | ns |
| **Aβ42/40 (log)** | ADD | MCI- | -0.266 | 0.126 | 927 | -2.107 | 0.284 | ns |
| **Aβ42/40 (log)** | ADD | NonAD | -0.277 | 0.146 | 927 | -1.897 | 0.404 | ns |
| **Aβ42/40 (log)** | MCI+ | MCI- | -0.156 | 0.094 | 927 | -1.658 | 0.560 | ns |
| **Aβ42/40 (log)** | CU- | ADD | 0.192 | 0.121 | 927 | 1.585 | 0.609 | ns |
| **Aβ42/40 (log)** | CU- | MCI- | -0.074 | 0.047 | 927 | -1.573 | 0.617 | ns |
| **Aβ42/40 (log)** | CU+ | ADD | 0.192 | 0.125 | 927 | 1.530 | 0.645 | ns |
| **Aβ42/40 (log)** | MCI+ | NonAD | -0.166 | 0.119 | 927 | -1.394 | 0.731 | ns |
| **Aβ42/40 (log)** | CU+ | MCI- | -0.074 | 0.058 | 927 | -1.286 | 0.793 | ns |
| **Aβ42/40 (log)** | CU- | NonAD | -0.085 | 0.088 | 927 | -0.958 | 0.931 | ns |
| **Aβ42/40 (log)** | CU- | MCI+ | 0.082 | 0.086 | 927 | 0.951 | 0.933 | ns |
| **Aβ42/40 (log)** | CU+ | NonAD | -0.085 | 0.094 | 927 | -0.899 | 0.947 | ns |
| **Aβ42/40 (log)** | CU+ | MCI+ | 0.082 | 0.092 | 927 | 0.887 | 0.950 | ns |
| **Aβ42/40 (log)** | MCI+ | ADD | 0.110 | 0.145 | 927 | 0.761 | 0.974 | ns |
| **Aβ42/40 (log)** | MCI- | NonAD | -0.011 | 0.096 | 927 | -0.112 | 1.000 | ns |
| **Aβ42/40 (log)** | CU- | CU+ | 0.000 | 0.039 | 927 | 0.003 | 1.000 | ns |
| **Aβ40 (log)** | CU- | MCI- | 0.101 | 0.043 | 937 | 2.378 | 0.165 | ns |
| **Aβ40 (log)** | MCI+ | MCI- | 0.148 | 0.085 | 937 | 1.737 | 0.507 | ns |
| **Aβ40 (log)** | MCI+ | NonAD | 0.162 | 0.108 | 937 | 1.492 | 0.670 | ns |
| **Aβ40 (log)** | CU- | NonAD | 0.115 | 0.080 | 937 | 1.434 | 0.706 | ns |
| **Aβ40 (log)** | CU- | CU+ | 0.042 | 0.036 | 937 | 1.169 | 0.851 | ns |
| **Aβ40 (log)** | CU+ | MCI- | 0.060 | 0.052 | 937 | 1.142 | 0.864 | ns |
| **Aβ40 (log)** | CU+ | MCI+ | -0.088 | 0.083 | 937 | -1.059 | 0.897 | ns |
| **Aβ40 (log)** | ADD | MCI- | 0.105 | 0.114 | 937 | 0.915 | 0.943 | ns |
| **Aβ40 (log)** | ADD | NonAD | 0.118 | 0.132 | 937 | 0.894 | 0.948 | ns |
| **Aβ40 (log)** | CU+ | NonAD | 0.073 | 0.085 | 937 | 0.856 | 0.957 | ns |
| **Aβ40 (log)** | CU- | MCI+ | -0.047 | 0.078 | 937 | -0.600 | 0.991 | ns |
| **Aβ40 (log)** | CU+ | ADD | -0.045 | 0.114 | 937 | -0.397 | 0.999 | ns |
| **Aβ40 (log)** | MCI+ | ADD | 0.043 | 0.131 | 937 | 0.330 | 0.999 | ns |
| **Aβ40 (log)** | MCI- | NonAD | 0.014 | 0.087 | 937 | 0.156 | 1.000 | ns |
| **Aβ40 (log)** | CU- | ADD | -0.004 | 0.110 | 937 | -0.032 | 1.000 | ns |
| **Aβ42 (log)** | CU- | ADD | 0.192 | 0.096 | 941 | 2.006 | 0.340 | ns |
| **Aβ42 (log)** | ADD | MCI- | -0.162 | 0.100 | 941 | -1.622 | 0.584 | ns |
| **Aβ42 (log)** | CU- | CU+ | 0.047 | 0.031 | 941 | 1.526 | 0.648 | ns |
| **Aβ42 (log)** | CU+ | ADD | 0.145 | 0.099 | 941 | 1.462 | 0.688 | ns |
| **Aβ42 (log)** | ADD | NonAD | -0.157 | 0.114 | 941 | -1.377 | 0.741 | ns |
| **Aβ42 (log)** | MCI+ | ADD | 0.154 | 0.114 | 941 | 1.345 | 0.760 | ns |
| **Aβ42 (log)** | CU- | MCI- | 0.030 | 0.037 | 941 | 0.818 | 0.964 | ns |
| **Aβ42 (log)** | CU- | MCI+ | 0.038 | 0.068 | 941 | 0.562 | 0.993 | ns |
| **Aβ42 (log)** | CU- | NonAD | 0.035 | 0.068 | 941 | 0.507 | 0.996 | ns |
| **Aβ42 (log)** | CU+ | MCI- | -0.017 | 0.045 | 941 | -0.371 | 0.999 | ns |
| **Aβ42 (log)** | CU+ | NonAD | -0.013 | 0.073 | 941 | -0.173 | 1.000 | ns |
| **Aβ42 (log)** | CU+ | MCI+ | -0.009 | 0.073 | 941 | -0.123 | 1.000 | ns |
| **Aβ42 (log)** | MCI+ | MCI- | -0.008 | 0.074 | 941 | -0.107 | 1.000 | ns |
| **Aβ42 (log)** | MCI- | NonAD | 0.004 | 0.074 | 941 | 0.057 | 1.000 | ns |
| **Aβ42 (log)** | MCI+ | NonAD | -0.004 | 0.093 | 941 | -0.040 | 1.000 | ns |
| **GFAP (log)** | CU+ | ADD | -0.347 | 0.183 | 951 | -1.897 | 0.405 | ns |
| **GFAP (log)** | ADD | NonAD | 0.389 | 0.211 | 951 | 1.838 | 0.442 | ns |
| **GFAP (log)** | CU- | ADD | -0.325 | 0.177 | 951 | -1.837 | 0.443 | ns |
| **GFAP (log)** | CU- | MCI- | -0.123 | 0.068 | 951 | -1.800 | 0.466 | ns |
| **GFAP (log)** | CU+ | MCI- | -0.146 | 0.084 | 951 | -1.737 | 0.508 | ns |
| **GFAP (log)** | MCI- | NonAD | 0.187 | 0.137 | 951 | 1.361 | 0.750 | ns |
| **GFAP (log)** | ADD | MCI- | 0.202 | 0.184 | 951 | 1.094 | 0.884 | ns |
| **GFAP (log)** | MCI+ | NonAD | 0.183 | 0.172 | 951 | 1.062 | 0.896 | ns |
| **GFAP (log)** | CU+ | MCI+ | -0.142 | 0.134 | 951 | -1.056 | 0.899 | ns |
| **GFAP (log)** | MCI+ | ADD | -0.205 | 0.211 | 951 | -0.972 | 0.927 | ns |
| **GFAP (log)** | CU- | MCI+ | -0.120 | 0.126 | 951 | -0.952 | 0.933 | ns |
| **GFAP (log)** | CU- | NonAD | 0.064 | 0.126 | 951 | 0.505 | 0.996 | ns |
| **GFAP (log)** | CU- | CU+ | 0.022 | 0.057 | 951 | 0.393 | 0.999 | ns |
| **GFAP (log)** | CU+ | NonAD | 0.041 | 0.135 | 951 | 0.306 | 1.000 | ns |
| **GFAP (log)** | MCI+ | MCI- | -0.004 | 0.137 | 951 | -0.027 | 1.000 | ns |

**Supplementary Table 5.** Results of ANOVA with post-hoc Tukey pairwise comparisons between diagnostic clinico-pathological groups for each protein marker. The table reports the estimated mean for the two groups, mean difference (estimate) and adjusted p-value. Significance is annotated as ***p < 0.001; **p < 0.01; *p < 0.05; ns = not significant.

| **marker** | **Group1** | **Group2** | **Mean 1** | **Mean 2** | **Estimate** | **p.value** | **annotation** |
| --- | --- | --- | --- | --- | --- | --- | --- |
| **Aβ40 (log)** | MCI- | CU- | 1.463246 | 1.570932 | -0.10769 | 0.002693 | ** |
| **Aβ40 (log)** | MCI- | CU+ | 1.463246 | 1.542062 | -0.07882 | 0.099084 | ns |
| **Aβ40 (log)** | MCI+ | MCI- | 1.609536 | 1.463246 | 0.14629 | 0.212083 | ns |
| **Aβ40 (log)** | NonAD | CU- | 1.444937 | 1.570932 | -0.12599 | 0.63348 | ns |
| **Aβ40 (log)** | MCI- | ADD | 1.463246 | 1.564672 | -0.10143 | 0.63348 | ns |
| **Aβ40 (log)** | MCI+ | NonAD | 1.609536 | 1.444937 | 0.164598 | 0.726169 | ns |
| **Aβ40 (log)** | NonAD | CU+ | 1.444937 | 1.542062 | -0.09712 | 0.747727 | ns |
| **Aβ40 (log)** | CU+ | CU- | 1.542062 | 1.570932 | -0.02887 | 0.833864 | ns |
| **Aβ40 (log)** | ADD | NonAD | 1.564672 | 1.444937 | 0.119735 | 0.833864 | ns |
| **Aβ40 (log)** | ADD | CU- | 1.564672 | 1.570932 | -0.00626 | 0.855988 | ns |
| **Aβ40 (log)** | MCI+ | CU- | 1.609536 | 1.570932 | 0.038604 | 0.855988 | ns |
| **Aβ40 (log)** | MCI+ | CU+ | 1.609536 | 1.542062 | 0.067473 | 0.855988 | ns |
| **Aβ40 (log)** | MCI- | NonAD | 1.463246 | 1.444937 | 0.018309 | 0.855988 | ns |
| **Aβ40 (log)** | MCI+ | ADD | 1.609536 | 1.564672 | 0.044864 | 0.855988 | ns |
| **Aβ40 (log)** | ADD | CU+ | 1.564672 | 1.542062 | 0.02261 | 0.920038 | ns |
| **Aβ42/40** | ADD | CU- | 0.157394 | 0.252608 | -0.09521 | 0.329874 | ns |
| **Aβ42/40** | ADD | NonAD | 0.157394 | 0.314835 | -0.15744 | 0.329874 | ns |
| **Aβ42/40** | MCI- | ADD | 0.267139 | 0.157394 | 0.109745 | 0.329874 | ns |
| **Aβ42/40** | MCI+ | ADD | 0.225031 | 0.157394 | 0.067637 | 0.329874 | ns |
| **Aβ42/40** | ADD | CU+ | 0.157394 | 0.231806 | -0.07441 | 0.567182 | ns |
| **Aβ42/40** | CU+ | CU- | 0.231806 | 0.252608 | -0.0208 | 0.773721 | ns |
| **Aβ42/40** | MCI- | CU+ | 0.267139 | 0.231806 | 0.035333 | 0.773721 | ns |
| **Aβ42/40** | NonAD | CU- | 0.314835 | 0.252608 | 0.062226 | 0.847746 | ns |
| **Aβ42/40** | MCI- | CU- | 0.267139 | 0.252608 | 0.014531 | 0.847746 | ns |
| **Aβ42/40** | MCI+ | CU- | 0.225031 | 0.252608 | -0.02758 | 0.847746 | ns |
| **Aβ42/40** | NonAD | CU+ | 0.314835 | 0.231806 | 0.083028 | 0.847746 | ns |
| **Aβ42/40** | MCI+ | NonAD | 0.225031 | 0.314835 | -0.0898 | 0.847746 | ns |
| **Aβ42/40** | MCI+ | MCI- | 0.225031 | 0.267139 | -0.04211 | 0.847746 | ns |
| **Aβ42/40** | MCI+ | CU+ | 0.225031 | 0.231806 | -0.00678 | 0.880323 | ns |
| **Aβ42/40** | MCI- | NonAD | 0.267139 | 0.314835 | -0.0477 | 0.880323 | ns |
| **Aβ42 (log)** | ADD | CU- | 0.249132 | 0.402144 | -0.15301 | 0.457166 | ns |
| **Aβ42 (log)** | ADD | NonAD | 0.249132 | 0.390507 | -0.14137 | 0.457166 | ns |
| **Aβ42 (log)** | MCI- | ADD | 0.385773 | 0.249132 | 0.13664 | 0.457166 | ns |
| **Aβ42 (log)** | MCI+ | ADD | 0.38608 | 0.249132 | 0.136947 | 0.457166 | ns |
| **Aβ42 (log)** | ADD | CU+ | 0.249132 | 0.369589 | -0.12046 | 0.474885 | ns |
| **Aβ42 (log)** | CU+ | CU- | 0.369589 | 0.402144 | -0.03255 | 0.804937 | ns |
| **Aβ42 (log)** | NonAD | CU- | 0.390507 | 0.402144 | -0.01164 | 0.961844 | ns |
| **Aβ42 (log)** | MCI- | CU- | 0.385773 | 0.402144 | -0.01637 | 0.961844 | ns |
| **Aβ42 (log)** | NonAD | CU+ | 0.390507 | 0.369589 | 0.020918 | 0.961844 | ns |
| **Aβ42 (log)** | MCI- | CU+ | 0.385773 | 0.369589 | 0.016184 | 0.961844 | ns |
| **Aβ42 (log)** | MCI+ | CU+ | 0.38608 | 0.369589 | 0.016491 | 0.961844 | ns |
| **Aβ42 (log)** | MCI- | NonAD | 0.385773 | 0.390507 | -0.00473 | 0.961844 | ns |
| **Aβ42 (log)** | MCI+ | NonAD | 0.38608 | 0.390507 | -0.00443 | 0.961844 | ns |
| **Aβ42 (log)** | MCI+ | MCI- | 0.38608 | 0.385773 | 0.000307 | 0.961844 | ns |
| **Aβ42 (log)** | MCI+ | CU- | 0.38608 | 0.402144 | -0.01606 | 0.967198 | ns |
| **GFAP (log)** | MCI- | CU- | 2.082906 | 1.889266 | 0.19364 | 1.08E-05 | *** |
| **GFAP (log)** | ADD | CU- | 2.363511 | 1.889266 | 0.474245 | 0.000146 | *** |
| **GFAP (log)** | ADD | CU+ | 2.363511 | 1.875108 | 0.488403 | 0.00048 | *** |
| **GFAP (log)** | MCI+ | CU- | 2.102616 | 1.889266 | 0.21335 | 0.00566 | ** |
| **GFAP (log)** | MCI- | CU+ | 2.082906 | 1.875108 | 0.207799 | 0.00566 | ** |
| **GFAP (log)** | ADD | NonAD | 2.363511 | 1.922649 | 0.440863 | 0.007693 | ** |
| **GFAP (log)** | MCI- | ADD | 2.082906 | 2.363511 | -0.2806 | 0.01124 | * |
| **GFAP (log)** | MCI+ | CU+ | 2.102616 | 1.875108 | 0.227508 | 0.015607 | * |
| **GFAP (log)** | MCI+ | NonAD | 2.102616 | 1.922649 | 0.179967 | 0.100648 | ns |
| **GFAP (log)** | MCI- | NonAD | 2.082906 | 1.922649 | 0.160258 | 0.224109 | ns |
| **GFAP (log)** | MCI+ | MCI- | 2.102616 | 2.082906 | 0.019709 | 0.224109 | ns |
| **GFAP (log)** | MCI+ | ADD | 2.102616 | 2.363511 | -0.2609 | 0.305136 | ns |
| **GFAP (log)** | CU+ | CU- | 1.875108 | 1.889266 | -0.01416 | 0.334389 | ns |
| **GFAP (log)** | NonAD | CU- | 1.922649 | 1.889266 | 0.033382 | 0.334456 | ns |
| **GFAP (log)** | NonAD | CU+ | 1.922649 | 1.875108 | 0.047541 | 0.735147 | ns |
| **NfL (log)** | MCI- | CU- | 1.356572 | 1.214071 | 0.1425 | 1.82E-05 | *** |
| **NfL (log)** | MCI+ | CU- | 1.514897 | 1.214071 | 0.300826 | 1.82E-05 | *** |
| **NfL (log)** | ADD | CU- | 1.562468 | 1.214071 | 0.348397 | 0.000358 | *** |
| **NfL (log)** | NonAD | CU- | 1.485668 | 1.214071 | 0.271597 | 0.000637 | *** |
| **NfL (log)** | MCI+ | CU+ | 1.514897 | 1.285423 | 0.229474 | 0.00397 | ** |
| **NfL (log)** | ADD | CU+ | 1.562468 | 1.285423 | 0.277045 | 0.008833 | ** |
| **NfL (log)** | MCI+ | MCI- | 1.514897 | 1.356572 | 0.158325 | 0.014713 | * |
| **NfL (log)** | MCI- | ADD | 1.356572 | 1.562468 | -0.2059 | 0.016069 | * |
| **NfL (log)** | CU+ | CU- | 1.285423 | 1.214071 | 0.071352 | 0.027971 | * |
| **NfL (log)** | NonAD | CU+ | 1.485668 | 1.285423 | 0.200245 | 0.040353 | * |
| **NfL (log)** | MCI- | CU+ | 1.356572 | 1.285423 | 0.071148 | 0.129101 | ns |
| **NfL (log)** | MCI- | NonAD | 1.356572 | 1.485668 | -0.1291 | 0.234963 | ns |
| **NfL (log)** | ADD | NonAD | 1.562468 | 1.485668 | 0.0768 | 0.247467 | ns |
| **NfL (log)** | MCI+ | NonAD | 1.514897 | 1.485668 | 0.029229 | 0.294674 | ns |
| **NfL (log)** | MCI+ | ADD | 1.514897 | 1.562468 | -0.04757 | 0.6331 | ns |
| **ptau-217 (log)** | MCI+ | CU- | -0.32404 | -0.69535 | 0.371312 | 9.14E-08 | *** |
| **ptau-217 (log)** | CU+ | CU- | -0.58573 | -0.69535 | 0.109627 | 8.42E-07 | *** |
| **ptau-217 (log)** | MCI+ | MCI- | -0.32404 | -0.68849 | 0.364454 | 8.42E-07 | *** |
| **ptau-217 (log)** | MCI+ | NonAD | -0.32404 | -0.65167 | 0.327632 | 0.000142 | *** |
| **ptau-217 (log)** | ADD | CU- | -0.37539 | -0.69535 | 0.319966 | 0.000724 | *** |
| **ptau-217 (log)** | MCI- | CU+ | -0.68849 | -0.58573 | -0.10277 | 0.000724 | *** |
| **ptau-217 (log)** | MCI- | ADD | -0.68849 | -0.37539 | -0.31311 | 0.001373 | ** |
| **ptau-217 (log)** | ADD | NonAD | -0.37539 | -0.65167 | 0.276285 | 0.006527 | ** |
| **ptau-217 (log)** | MCI+ | CU+ | -0.32404 | -0.58573 | 0.261685 | 0.01309 | * |
| **ptau-217 (log)** | NonAD | CU+ | -0.65167 | -0.58573 | -0.06595 | 0.03864 | * |
| **ptau-217 (log)** | NonAD | CU- | -0.65167 | -0.69535 | 0.04368 | 0.200894 | ns |
| **ptau-217 (log)** | ADD | CU+ | -0.37539 | -0.58573 | 0.210339 | 0.221848 | ns |
| **ptau-217 (log)** | MCI- | NonAD | -0.68849 | -0.65167 | -0.03682 | 0.319794 | ns |
| **ptau-217 (log)** | MCI+ | ADD | -0.32404 | -0.37539 | 0.051347 | 0.621163 | ns |
| **ptau-217 (log)** | MCI- | CU- | -0.68849 | -0.69535 | 0.006859 | 0.670484 | ns |

**Supplementary Table 6.** Results of ANCOVA with post-hoc Tukey pairwise comparisons between diagnostic groups for each protein marker in the NULISA analysis. The table reports the estimated mean difference (estimate), standard error (SE), degrees of freedom (df), t-ratio, and adjusted p-value. Significance is annotated as ***p < 0.001; **p < 0.01; *p < 0.05; ns = not significant.

| **biomarker** | **Group1** | **Group2** | **estimate** | **SE** | **df** | **t.ratio** | **p.value** | **annotation** |
| --- | --- | --- | --- | --- | --- | --- | --- | --- |
| **NfL** | CU | Dem | -0.726 | 0.227 | 907 | -3.203 | 0.004 | ** |
| **NfL** | CU | MCI | -0.348 | 0.128 | 907 | -2.713 | 0.019 | * |
| **NfL** | MCI | Dem | -0.378 | 0.245 | 907 | -1.544 | 0.271 | ns |
| **ptau-217** | CU | Dem | -0.307 | 0.101 | 903 | -3.028 | 0.007 | ** |
| **ptau-217** | MCI | Dem | -0.212 | 0.110 | 903 | -1.937 | 0.129 | ns |
| **ptau-217** | CU | MCI | -0.095 | 0.057 | 903 | -1.652 | 0.224 | ns |
| **Aβ42/40** | CU | MCI | 0.025 | 0.012 | 904 | 2.108 | 0.089 | ns |
| **Aβ42/40** | CU | Dem | 0.030 | 0.021 | 904 | 1.399 | 0.342 | ns |
| **Aβ42/40** | MCI | Dem | 0.005 | 0.023 | 904 | 0.213 | 0.975 | ns |
| **Aβ40** | MCI | Dem | 0.556 | 0.251 | 907 | 2.212 | 0.070 | ns |
| **Aβ40** | CU | MCI | -0.273 | 0.132 | 907 | -2.075 | 0.096 | ns |
| **Aβ40** | CU | Dem | 0.283 | 0.233 | 907 | 1.216 | 0.444 | ns |
| **Aβ42** | CU | Dem | 0.149 | 0.188 | 906 | 0.792 | 0.708 | ns |
| **Aβ42** | MCI | Dem | 0.120 | 0.203 | 906 | 0.591 | 0.825 | ns |
| **Aβ42** | CU | MCI | 0.029 | 0.106 | 906 | 0.272 | 0.960 | ns |
| **GFAP** | CU | MCI | -0.465 | 0.136 | 908 | -3.415 | 0.002 | ** |
| **GFAP** | CU | Dem | -0.651 | 0.241 | 908 | -2.705 | 0.019 | * |
| **GFAP** | MCI | Dem | -0.186 | 0.260 | 908 | -0.715 | 0.755 | ns |

**Supplementary Table 7.** Results of ANOVA with post-hoc Tukey pairwise comparisons between diagnostic groups for each protein marker in the NULISA analysis. The table reports the estimated mean for the two groups, mean difference (estimate) and adjusted p-value. Significance is annotated as ***p < 0.001; **p < 0.01; *p < 0.05; ns = not significant.

| **marker** | **Group1** | **Group2** | **Mean 1** | **Mean 2** | **Estimate** | **p.value** | **annotation** |
| --- | --- | --- | --- | --- | --- | --- | --- |
| **Aβ40** | MCI | CU | 12.93265 | 12.4393 | 0.493358 | 8.5E-05 | *** |
| **Aβ40** | Dem | CU | 12.50489 | 12.4393 | 0.065593 | 0.09414 | ns |
| **Aβ40** | Dem | MCI | 12.50489 | 12.93265 | -0.42776 | 0.615359 | ns |
| **Aβ42** | MCI | CU | 11.6269 | 11.59813 | 0.028765 | 0.790689 | ns |
| **Aβ42** | Dem | CU | 11.51324 | 11.59813 | -0.08489 | 0.790689 | ns |
| **Aβ42** | Dem | MCI | 11.51324 | 11.6269 | -0.11365 | 0.790689 | ns |
| **Aβ42/40** | MCI | CU | 0.906243 | 0.938989 | -0.03275 | 0.017699 | * |
| **Aβ42/40** | Dem | CU | 0.898752 | 0.938989 | -0.04024 | 0.131479 | ns |
| **Aβ42/40** | Dem | MCI | 0.898752 | 0.906243 | -0.00749 | 0.889659 | ns |
| **GFAP** | MCI | CU | 12.77417 | 12.01076 | 0.76341 | 4.66E-12 | *** |
| **GFAP** | Dem | CU | 13.09552 | 12.01076 | 1.084755 | 1.56E-05 | *** |
| **GFAP** | Dem | MCI | 13.09552 | 12.77417 | 0.321345 | 0.44145 | ns |
| **NfL** | MCI | CU | 12.32158 | 11.54919 | 0.772384 | 5.5E-09 | *** |
| **NfL** | Dem | CU | 12.83788 | 11.54919 | 1.288692 | 4.39E-06 | *** |
| **NfL** | Dem | MCI | 12.83788 | 12.32158 | 0.516308 | 0.107121 | ns |
| **p-tau217** | MCI | CU | 11.36213 | 11.16148 | 0.200653 | 0.002139 | ** |
| **p-tau217** | Dem | CU | 11.57326 | 11.16148 | 0.41178 | 0.019703 | * |
| **p-tau217** | Dem | MCI | 11.57326 | 11.36213 | 0.211127 | 0.547546 | ns |

**Supplementary Table 8.** Results of ANCOVA with post-hoc Tukey pairwise comparisons between clinico-pathological groups for each protein marker in the NULISA analysis. The table reports the estimated mean difference (estimate), standard error (SE), degrees of freedom (df), t-ratio, and adjusted p-value. Significance is annotated as ***p < 0.001; **p < 0.01; *p < 0.05; ns = not significant.

| **marker** | **Group1** | **Group2** | **estimate** | **SE** | **df** | **t.ratio** | **p.value** | **annotation** |
| --- | --- | --- | --- | --- | --- | --- | --- | --- |
| **NfL** | CU- | NonAD | -0.717 | 0.267 | 904 | -2.688 | 0.079 | ns |
| **NfL** | CU- | MCI+ | -0.664 | 0.261 | 904 | -2.546 | 0.112 | ns |
| **NfL** | CU+ | NonAD | -0.629 | 0.283 | 904 | -2.221 | 0.229 | ns |
| **NfL** | CU- | ADD | -0.821 | 0.384 | 904 | -2.139 | 0.268 | ns |
| **NfL** | CU+ | MCI+ | -0.576 | 0.278 | 904 | -2.073 | 0.302 | ns |
| **NfL** | CU- | MCI- | -0.283 | 0.142 | 904 | -1.996 | 0.345 | ns |
| **NfL** | CU+ | ADD | -0.733 | 0.398 | 904 | -1.844 | 0.438 | ns |
| **NfL** | MCI- | NonAD | -0.434 | 0.290 | 904 | -1.496 | 0.667 | ns |
| **NfL** | ADD | MCI- | 0.538 | 0.399 | 904 | 1.349 | 0.757 | ns |
| **NfL** | MCI+ | MCI- | 0.381 | 0.284 | 904 | 1.340 | 0.763 | ns |
| **NfL** | CU+ | MCI- | -0.195 | 0.173 | 904 | -1.127 | 0.870 | ns |
| **NfL** | CU- | CU+ | -0.088 | 0.117 | 904 | -0.747 | 0.976 | ns |
| **NfL** | MCI+ | ADD | -0.157 | 0.451 | 904 | -0.348 | 0.999 | ns |
| **NfL** | ADD | NonAD | 0.104 | 0.448 | 904 | 0.232 | 1.000 | ns |
| **NfL** | MCI+ | NonAD | -0.053 | 0.356 | 904 | -0.149 | 1.000 | ns |
| **ptau-217** | CU- | MCI+ | -0.529 | 0.114 | 900 | -4.628 | 0.000 | *** |
| **ptau-217** | CU- | CU+ | -0.232 | 0.052 | 900 | -4.501 | 0.000 | *** |
| **ptau-217** | MCI+ | MCI- | 0.503 | 0.125 | 900 | 4.032 | 0.001 | *** |
| **ptau-217** | CU- | ADD | -0.629 | 0.168 | 900 | -3.738 | 0.003 | ** |
| **ptau-217** | ADD | MCI- | 0.603 | 0.175 | 900 | 3.445 | 0.008 | ** |
| **ptau-217** | CU+ | MCI- | 0.206 | 0.076 | 900 | 2.702 | 0.076 | ns |
| **ptau-217** | CU+ | MCI+ | -0.297 | 0.122 | 900 | -2.433 | 0.146 | ns |
| **ptau-217** | CU+ | ADD | -0.397 | 0.174 | 900 | -2.274 | 0.206 | ns |
| **ptau-217** | ADD | NonAD | 0.397 | 0.197 | 900 | 2.019 | 0.332 | ns |
| **ptau-217** | CU- | NonAD | -0.232 | 0.117 | 900 | -1.985 | 0.352 | ns |
| **ptau-217** | MCI+ | NonAD | 0.297 | 0.156 | 900 | 1.900 | 0.403 | ns |
| **ptau-217** | MCI- | NonAD | -0.206 | 0.127 | 900 | -1.617 | 0.588 | ns |
| **ptau-217** | MCI+ | ADD | -0.100 | 0.198 | 900 | -0.505 | 0.996 | ns |
| **ptau-217** | CU- | MCI- | -0.027 | 0.062 | 900 | -0.428 | 0.998 | ns |
| **ptau-217** | CU+ | NonAD | 0.000 | 0.124 | 900 | 0.002 | 1.000 | ns |
| **Aβ42/40** | CU+ | MCI- | 0.033 | 0.016 | 901 | 2.058 | 0.310 | ns |
| **Aβ42/40** | CU- | MCI- | 0.022 | 0.013 | 901 | 1.691 | 0.538 | ns |
| **Aβ42/40** | CU+ | MCI+ | 0.040 | 0.026 | 901 | 1.538 | 0.639 | ns |
| **Aβ42/40** | CU+ | ADD | 0.056 | 0.037 | 901 | 1.518 | 0.653 | ns |
| **Aβ42/40** | CU- | ADD | 0.045 | 0.036 | 901 | 1.267 | 0.803 | ns |
| **Aβ42/40** | CU- | MCI+ | 0.029 | 0.024 | 901 | 1.189 | 0.842 | ns |
| **Aβ42/40** | CU+ | NonAD | 0.032 | 0.027 | 901 | 1.175 | 0.849 | ns |
| **Aβ42/40** | CU- | CU+ | -0.011 | 0.011 | 901 | -1.001 | 0.918 | ns |
| **Aβ42/40** | CU- | NonAD | 0.021 | 0.025 | 901 | 0.815 | 0.965 | ns |
| **Aβ42/40** | ADD | MCI- | -0.023 | 0.037 | 901 | -0.619 | 0.990 | ns |
| **Aβ42/40** | ADD | NonAD | -0.024 | 0.042 | 901 | -0.583 | 0.992 | ns |
| **Aβ42/40** | MCI+ | ADD | 0.016 | 0.042 | 901 | 0.391 | 0.999 | ns |
| **Aβ42/40** | MCI+ | MCI- | -0.007 | 0.026 | 901 | -0.248 | 1.000 | ns |
| **Aβ42/40** | MCI+ | NonAD | -0.008 | 0.034 | 901 | -0.241 | 1.000 | ns |
| **Aβ42/40** | MCI- | NonAD | -0.002 | 0.027 | 901 | -0.056 | 1.000 | ns |
| **Aβ40** | CU+ | MCI- | -0.447 | 0.178 | 904 | -2.515 | 0.121 | ns |
| **Aβ40** | MCI- | NonAD | 0.701 | 0.297 | 904 | 2.356 | 0.173 | ns |
| **Aβ40** | CU- | MCI- | -0.269 | 0.145 | 904 | -1.851 | 0.433 | ns |
| **Aβ40** | MCI+ | NonAD | 0.601 | 0.366 | 904 | 1.645 | 0.569 | ns |
| **Aβ40** | CU- | NonAD | 0.432 | 0.274 | 904 | 1.578 | 0.613 | ns |
| **Aβ40** | CU- | CU+ | 0.178 | 0.120 | 904 | 1.481 | 0.677 | ns |
| **Aβ40** | CU+ | MCI+ | -0.348 | 0.285 | 904 | -1.221 | 0.827 | ns |
| **Aβ40** | CU+ | NonAD | 0.253 | 0.291 | 904 | 0.872 | 0.953 | ns |
| **Aβ40** | ADD | NonAD | 0.388 | 0.460 | 904 | 0.844 | 0.959 | ns |
| **Aβ40** | ADD | MCI- | -0.313 | 0.409 | 904 | -0.765 | 0.973 | ns |
| **Aβ40** | CU- | MCI+ | -0.170 | 0.267 | 904 | -0.635 | 0.988 | ns |
| **Aβ40** | MCI+ | ADD | 0.213 | 0.463 | 904 | 0.461 | 0.997 | ns |
| **Aβ40** | MCI+ | MCI- | -0.099 | 0.292 | 904 | -0.341 | 0.999 | ns |
| **Aβ40** | CU+ | ADD | -0.135 | 0.408 | 904 | -0.330 | 0.999 | ns |
| **Aβ40** | CU- | ADD | 0.044 | 0.394 | 904 | 0.111 | 1.000 | ns |
| **Aβ42** | CU- | ADD | 0.520 | 0.318 | 903 | 1.638 | 0.573 | ns |
| **Aβ42** | ADD | MCI- | -0.506 | 0.330 | 903 | -1.534 | 0.642 | ns |
| **Aβ42** | CU+ | ADD | 0.477 | 0.329 | 903 | 1.449 | 0.697 | ns |
| **Aβ42** | ADD | NonAD | -0.525 | 0.371 | 903 | -1.416 | 0.718 | ns |
| **Aβ42** | MCI+ | ADD | 0.396 | 0.373 | 903 | 1.062 | 0.896 | ns |
| **Aβ42** | CU- | MCI+ | 0.124 | 0.216 | 903 | 0.575 | 0.993 | ns |
| **Aβ42** | MCI+ | MCI- | -0.110 | 0.235 | 903 | -0.467 | 0.997 | ns |
| **Aβ42** | CU- | CU+ | 0.043 | 0.097 | 903 | 0.444 | 0.998 | ns |
| **Aβ42** | MCI+ | NonAD | -0.129 | 0.295 | 903 | -0.436 | 0.998 | ns |
| **Aβ42** | CU+ | MCI+ | 0.081 | 0.230 | 903 | 0.351 | 0.999 | ns |
| **Aβ42** | CU+ | NonAD | -0.048 | 0.234 | 903 | -0.204 | 1.000 | ns |
| **Aβ42** | CU+ | MCI- | -0.029 | 0.144 | 903 | -0.203 | 1.000 | ns |
| **Aβ42** | CU- | MCI- | 0.014 | 0.117 | 903 | 0.120 | 1.000 | ns |
| **Aβ42** | MCI- | NonAD | -0.019 | 0.240 | 903 | -0.078 | 1.000 | ns |
| **Aβ42** | CU- | NonAD | -0.005 | 0.221 | 903 | -0.021 | 1.000 | ns |
| **GFAP** | CU- | MCI- | -0.450 | 0.151 | 905 | -2.985 | 0.034 | * |
| **GFAP** | CU+ | MCI- | -0.464 | 0.184 | 905 | -2.518 | 0.120 | ns |
| **GFAP** | CU- | ADD | -1.027 | 0.408 | 905 | -2.518 | 0.120 | ns |
| **GFAP** | CU+ | ADD | -1.042 | 0.423 | 905 | -2.464 | 0.136 | ns |
| **GFAP** | CU- | MCI+ | -0.524 | 0.277 | 905 | -1.890 | 0.409 | ns |
| **GFAP** | CU+ | MCI+ | -0.538 | 0.295 | 905 | -1.821 | 0.452 | ns |
| **GFAP** | CU- | NonAD | -0.483 | 0.284 | 905 | -1.702 | 0.530 | ns |
| **GFAP** | CU+ | NonAD | -0.497 | 0.301 | 905 | -1.651 | 0.565 | ns |
| **GFAP** | ADD | MCI- | 0.577 | 0.424 | 905 | 1.362 | 0.750 | ns |
| **GFAP** | ADD | NonAD | 0.545 | 0.476 | 905 | 1.143 | 0.863 | ns |
| **GFAP** | MCI+ | ADD | -0.504 | 0.480 | 905 | -1.050 | 0.901 | ns |
| **GFAP** | MCI+ | MCI- | 0.074 | 0.302 | 905 | 0.245 | 1.000 | ns |
| **GFAP** | CU- | CU+ | 0.015 | 0.125 | 905 | 0.116 | 1.000 | ns |
| **GFAP** | MCI+ | NonAD | 0.041 | 0.379 | 905 | 0.108 | 1.000 | ns |
| **GFAP** | MCI- | NonAD | -0.033 | 0.308 | 905 | -0.107 | 1.000 | ns |

**Supplementary Table 9.** Results of ANOVA with post-hoc Tukey pairwise comparisons between clinico-pathological groups for each protein marker in the NULISA analysis. The table reports the estimated mean for the two groups, mean difference (estimate) and adjusted p-value. Significance is annotated as ***p < 0.001; **p < 0.01; *p < 0.05; ns = not significant.

| **marker** | **Group1** | **Group2** | **Mean 1** | **Mean 2** | **Estimate** | **p.value** | **annotation** |
| --- | --- | --- | --- | --- | --- | --- | --- |
| **Aβ40** | MCI- | CU+ | 12.91111 | 12.34667 | 0.564441 | 0.007562 | ** |
| **Aβ40** | MCI- | CU- | 12.91111 | 12.45502 | 0.456096 | 0.007637 | ** |
| **Aβ40** | MCI+ | CU+ | 13.0149 | 12.34667 | 0.66823 | 0.0355 | * |
| **Aβ40** | MCI+ | CU- | 13.0149 | 12.45502 | 0.559884 | 0.037176 | * |
| **Aβ40** | NonAD | CU+ | 12.4269 | 12.34667 | 0.080225 | 0.16045 | ns |
| **Aβ40** | NonAD | CU- | 12.4269 | 12.45502 | -0.02812 | 0.256695 | ns |
| **Aβ40** | CU+ | CU- | 12.34667 | 12.45502 | -0.10835 | 0.309671 | ns |
| **Aβ40** | ADD | CU+ | 12.66087 | 12.34667 | 0.314202 | 0.444327 | ns |
| **Aβ40** | MCI+ | ADD | 13.0149 | 12.66087 | 0.354027 | 0.58243 | ns |
| **Aβ40** | ADD | CU- | 12.66087 | 12.45502 | 0.205856 | 0.638852 | ns |
| **Aβ40** | MCI- | ADD | 12.91111 | 12.66087 | 0.250239 | 0.638852 | ns |
| **Aβ40** | MCI+ | MCI- | 13.0149 | 12.91111 | 0.103788 | 0.638852 | ns |
| **Aβ40** | ADD | NonAD | 12.66087 | 12.4269 | 0.233977 | 0.699385 | ns |
| **Aβ40** | MCI+ | NonAD | 13.0149 | 12.4269 | 0.588004 | 0.729889 | ns |
| **Aβ40** | MCI- | NonAD | 12.91111 | 12.4269 | 0.484216 | 0.990677 | ns |
| **Aβ42** | CU+ | CU- | 11.55006 | 11.60623 | -0.05616 | 0.862282 | ns |
| **Aβ42** | NonAD | CU- | 11.59566 | 11.60623 | -0.01056 | 0.862282 | ns |
| **Aβ42** | ADD | CU- | 11.34841 | 11.60623 | -0.25782 | 0.862282 | ns |
| **Aβ42** | MCI- | CU- | 11.66509 | 11.60623 | 0.058861 | 0.862282 | ns |
| **Aβ42** | MCI+ | CU- | 11.48109 | 11.60623 | -0.12513 | 0.862282 | ns |
| **Aβ42** | NonAD | CU+ | 11.59566 | 11.55006 | 0.045601 | 0.862282 | ns |
| **Aβ42** | ADD | CU+ | 11.34841 | 11.55006 | -0.20166 | 0.862282 | ns |
| **Aβ42** | MCI- | CU+ | 11.66509 | 11.55006 | 0.115024 | 0.862282 | ns |
| **Aβ42** | MCI+ | CU+ | 11.48109 | 11.55006 | -0.06897 | 0.862282 | ns |
| **Aβ42** | ADD | NonAD | 11.34841 | 11.59566 | -0.24726 | 0.862282 | ns |
| **Aβ42** | MCI+ | NonAD | 11.48109 | 11.59566 | -0.11457 | 0.862282 | ns |
| **Aβ42** | MCI- | ADD | 11.66509 | 11.34841 | 0.316681 | 0.862282 | ns |
| **Aβ42** | MCI+ | ADD | 11.48109 | 11.34841 | 0.132686 | 0.862282 | ns |
| **Aβ42** | MCI+ | MCI- | 11.48109 | 11.66509 | -0.184 | 0.862282 | ns |
| **Aβ42** | MCI- | NonAD | 11.66509 | 11.59566 | 0.069423 | 0.941005 | ns |
| **Aβ42/40** | MCI+ | CU- | 0.887318 | 0.938227 | -0.05091 | 0.182082 | ns |
| **Aβ42/40** | MCI+ | CU+ | 0.887318 | 0.943512 | -0.05619 | 0.182082 | ns |
| **Aβ42/40** | MCI- | CU- | 0.9112 | 0.938227 | -0.02703 | 0.217452 | ns |
| **Aβ42/40** | MCI- | CU+ | 0.9112 | 0.943512 | -0.03231 | 0.217452 | ns |
| **Aβ42/40** | NonAD | CU- | 0.896613 | 0.938227 | -0.04161 | 0.334094 | ns |
| **Aβ42/40** | NonAD | CU+ | 0.896613 | 0.943512 | -0.0469 | 0.334094 | ns |
| **Aβ42/40** | MCI+ | MCI- | 0.887318 | 0.9112 | -0.02388 | 0.523217 | ns |
| **Aβ42/40** | ADD | CU+ | 0.902834 | 0.943512 | -0.04068 | 0.686778 | ns |
| **Aβ42/40** | ADD | CU- | 0.902834 | 0.938227 | -0.03539 | 0.697477 | ns |
| **Aβ42/40** | CU+ | CU- | 0.943512 | 0.938227 | 0.005285 | 0.720835 | ns |
| **Aβ42/40** | MCI+ | ADD | 0.887318 | 0.902834 | -0.01552 | 0.720835 | ns |
| **Aβ42/40** | MCI- | NonAD | 0.9112 | 0.896613 | 0.014587 | 0.79441 | ns |
| **Aβ42/40** | MCI+ | NonAD | 0.887318 | 0.896613 | -0.0093 | 0.79441 | ns |
| **Aβ42/40** | ADD | NonAD | 0.902834 | 0.896613 | 0.006221 | 0.902929 | ns |
| **Aβ42/40** | MCI- | ADD | 0.9112 | 0.902834 | 0.008366 | 0.939736 | ns |
| **GFAP** | MCI- | CU- | 12.73947 | 12.01261 | 0.726858 | 9.49E-09 | *** |
| **GFAP** | MCI- | CU+ | 12.73947 | 11.99984 | 0.739627 | 2.77E-05 | *** |
| **GFAP** | ADD | CU- | 13.63744 | 12.01261 | 1.624833 | 7.48E-05 | *** |
| **GFAP** | ADD | CU+ | 13.63744 | 11.99984 | 1.637602 | 0.000288 | *** |
| **GFAP** | MCI+ | CU- | 12.90667 | 12.01261 | 0.894058 | 0.000403 | *** |
| **GFAP** | MCI+ | CU+ | 12.90667 | 11.99984 | 0.906827 | 0.002177 | ** |
| **GFAP** | MCI- | ADD | 12.73947 | 13.63744 | -0.89798 | 0.027001 | * |
| **GFAP** | NonAD | CU- | 12.82455 | 12.01261 | 0.81194 | 0.028756 | * |
| **GFAP** | NonAD | CU+ | 12.82455 | 11.99984 | 0.824709 | 0.055517 | ns |
| **GFAP** | ADD | NonAD | 13.63744 | 12.82455 | 0.812893 | 0.067426 | ns |
| **GFAP** | MCI+ | ADD | 12.90667 | 13.63744 | -0.73078 | 0.267549 | ns |
| **GFAP** | MCI+ | MCI- | 12.90667 | 12.73947 | 0.1672 | 0.267549 | ns |
| **GFAP** | MCI+ | NonAD | 12.90667 | 12.82455 | 0.082118 | 0.466928 | ns |
| **GFAP** | MCI- | NonAD | 12.73947 | 12.82455 | -0.08508 | 0.706962 | ns |
| **GFAP** | CU+ | CU- | 11.99984 | 12.01261 | -0.01277 | 0.834074 | ns |
| **NfL** | MCI- | CU- | 12.19031 | 11.51647 | 0.673835 | 1.3E-05 | *** |
| **NfL** | MCI+ | CU- | 12.82278 | 11.51647 | 1.306303 | 3.67E-05 | *** |
| **NfL** | ADD | CU- | 12.85552 | 11.51647 | 1.339041 | 0.001101 | ** |
| **NfL** | NonAD | CU- | 12.82907 | 11.51647 | 1.312595 | 0.002613 | ** |
| **NfL** | MCI+ | CU+ | 12.82278 | 11.74196 | 1.080821 | 0.002613 | ** |
| **NfL** | ADD | CU+ | 12.85552 | 11.74196 | 1.113559 | 0.006049 | ** |
| **NfL** | NonAD | CU+ | 12.82907 | 11.74196 | 1.087112 | 0.040066 | * |
| **NfL** | MCI- | CU+ | 12.19031 | 11.74196 | 0.448353 | 0.040066 | * |
| **NfL** | MCI- | ADD | 12.19031 | 12.85552 | -0.66521 | 0.040066 | * |
| **NfL** | MCI+ | MCI- | 12.82278 | 12.19031 | 0.632468 | 0.040066 | * |
| **NfL** | CU+ | CU- | 11.74196 | 11.51647 | 0.225483 | 0.108924 | ns |
| **NfL** | MCI- | NonAD | 12.19031 | 12.82907 | -0.63876 | 0.325374 | ns |
| **NfL** | ADD | NonAD | 12.85552 | 12.82907 | 0.026447 | 0.553659 | ns |
| **NfL** | MCI+ | NonAD | 12.82278 | 12.82907 | -0.00629 | 0.606163 | ns |
| **NfL** | MCI+ | ADD | 12.82278 | 12.85552 | -0.03274 | 0.606163 | ns |
| **p-tau217** | MCI+ | CU- | 11.79305 | 11.12543 | 0.667615 | 2.16E-06 | *** |
| **p-tau217** | CU+ | CU- | 11.37473 | 11.12543 | 0.2493 | 7.16E-06 | *** |
| **p-tau217** | MCI+ | MCI- | 11.79305 | 11.24927 | 0.543775 | 0.000151 | *** |
| **p-tau217** | ADD | CU- | 11.85277 | 11.12543 | 0.72734 | 0.000591 | *** |
| **p-tau217** | MCI+ | CU+ | 11.79305 | 11.37473 | 0.418316 | 0.004758 | ** |
| **p-tau217** | MCI+ | NonAD | 11.79305 | 11.4335 | 0.359545 | 0.004758 | ** |
| **p-tau217** | MCI- | ADD | 11.24927 | 11.85277 | -0.6035 | 0.005044 | ** |
| **p-tau217** | ADD | CU+ | 11.85277 | 11.37473 | 0.478041 | 0.037311 | * |
| **p-tau217** | ADD | NonAD | 11.85277 | 11.4335 | 0.41927 | 0.037311 | * |
| **p-tau217** | MCI- | CU- | 11.24927 | 11.12543 | 0.123841 | 0.06203 | ns |
| **p-tau217** | MCI- | CU+ | 11.24927 | 11.37473 | -0.12546 | 0.06203 | ns |
| **p-tau217** | NonAD | CU+ | 11.4335 | 11.37473 | 0.058771 | 0.257729 | ns |
| **p-tau217** | NonAD | CU- | 11.4335 | 11.12543 | 0.308071 | 0.448807 | ns |
| **p-tau217** | MCI- | NonAD | 11.24927 | 11.4335 | -0.18423 | 1 | ns |
| **p-tau217** | MCI+ | ADD | 11.79305 | 11.85277 | -0.05972 | 1 | ns |

**Supplementary Table 10.** Results from linear regression models evaluating the association of diagnostic group, age, sex, and APOE ε4 carrier status with the biomarkers, both in VALIANT and TRIAD cohorts. The table reports regression coefficients (Estimate), standard errors, t values, and p values for each predictor. Significance levels are indicated as ***p < 0.001; **p < 0.01; *p < 0.05.

| **VALIANT cohort** | | | | |
| --- | --- | --- | --- | --- |
| **term** | **GFAP** | **NfL** | **Aβ42_40** | **pTau217** |
| (Intercept) | 1.78*** | 0.57*** | -1.02*** | -1.13*** |
| APOE status | 0.04 | 0.02 | -0.01 | 0.07* |
| MCI | 0.01 | 0.07 | 0.03 | 0.04 |
| Dementia | -0.15* | 0.17** | -0.01 | 0.09* |
| Age | 0.01** | 0.01*** | 0 | 0.01*** |
| Sex | -0.03 | -0.08* | 0.02 | *NA* |
| **TRIAD cohort** | | | | |
| **term** | **GFAP** | **NfL** | **Aβ42_40** | **pTau217** |
| (Intercept) | 4.58*** | 2.62*** | 0.07*** | -0.02 |
| APOE status | 0.13. | 0.05 | 0. | 0.22*** |
| MCI | 0.18* | 0.07 | 0 | 0.11 |
| Dementia | 0.34*** | 0.34*** | 0 | 0.5*** |
| Age | 0.14** | 0.17*** | 0 | 0.2*** |
| Sex | 0.19** | 0.06 | 0 | -0.08 |

**Supplementary Table 11.** Results from linear regression models evaluating the association of co-pathologies, age and sex with the biomarkers. The table reports the number of participants with or without copathologies, regression coefficients (Estimate), standard errors, t values, and p values for each predictor. Significance levels are indicated as ***p < 0.001; **p < 0.01; *p < 0.05.

| **predictor** | **biomarker** | **level counts** | **estimate** | **std.error** | **statistic** | **p.value** | **p adj bh** |
| --- | --- | --- | --- | --- | --- | --- | --- |
| comorbidities | Aß42/40 (log) | Yes=86; No=830 | -0.037 | 0.044 | -0.845 | 0.399 | 0.705 |
| comorbidities | GFAP (log) | Yes=89; No=851 | -0.132 | 0.064 | -2.059 | 0.040 | 0.183 |
| comorbidities | NfL (log) | Yes=89; No=850 | -0.030 | 0.029 | -1.031 | 0.303 | 0.696 |
| comorbidities | p-tau217 (log) | Yes=89; No=851 | -0.008 | 0.017 | -0.464 | 0.643 | 0.989 |
| heart disease | Aß42/40 (log) | Yes=403; No=513 | 0.004 | 0.026 | 0.158 | 0.875 | 0.926 |
| heart disease | GFAP (log) | Yes=410; No=530 | 0.007 | 0.038 | 0.170 | 0.865 | 0.948 |
| heart disease | NfL (log) | Yes=409; No=530 | 0.009 | 0.017 | 0.551 | 0.582 | 0.836 |
| heart disease | p-tau217 (log) | Yes=410; No=530 | -0.006 | 0.010 | -0.617 | 0.538 | 0.989 |
| infectious | Aß42/40 (log) | Yes=603; No=313 | -0.027 | 0.027 | -1.013 | 0.312 | 0.597 |
| infectious | GFAP (log) | Yes=620; No=320 | -0.198 | 0.039 | -5.055 | 0.000 | 0.000 |
| infectious | NfL (log) | Yes=619; No=320 | 0.001 | 0.018 | 0.047 | 0.962 | 0.975 |
| infectious | p-tau217 (log) | Yes=620; No=320 | -0.005 | 0.011 | -0.518 | 0.605 | 0.989 |
| inflammatory | Aß42/40 (log) | Yes=55; No=861 | 0.083 | 0.054 | 1.547 | 0.122 | 0.401 |
| inflammatory | GFAP (log) | Yes=57; No=883 | -0.094 | 0.078 | -1.200 | 0.231 | 0.586 |
| inflammatory | NfL (log) | Yes=57; No=882 | 0.052 | 0.035 | 1.474 | 0.141 | 0.545 |
| inflammatory | p-tau217 (log) | Yes=57; No=883 | -0.018 | 0.021 | -0.865 | 0.387 | 0.989 |
| lipid metabolism | Aß42/40 (log) | Yes=46; No=870 | 0.001 | 0.059 | 0.009 | 0.993 | 0.993 |
| lipid metabolism | GFAP (log) | Yes=46; No=894 | -0.061 | 0.087 | -0.695 | 0.487 | 0.730 |
| lipid metabolism | NfL (log) | Yes=46; No=893 | 0.045 | 0.039 | 1.157 | 0.248 | 0.633 |
| lipid metabolism | p-tau217 (log) | Yes=46; No=894 | -0.032 | 0.023 | -1.394 | 0.164 | 0.989 |
